# Supplementary material for: Discriminating cancer-related and cancer-unrelated chemoradiation-response genes for locally advanced rectal cancers
Source: PubMed Central journal article supplement (PMC5109405; doi:10.1038/srep36935), 2016-11-15
Supplement: srep36935-s1.pdf [file srep36935-s1.pdf]

## **Discriminating cancer-related and cancer-unrelated chemoradiation-response genes for locally advanced rectal cancers**

You Guo<sup>1,2</sup>, Jun Cheng<sup>1</sup>, Lu Ao<sup>1</sup>, Xiangyu Li<sup>1</sup>, Qingzhou Guan<sup>1</sup>, Juan Zhang<sup>1</sup>, Haidan Yan<sup>1</sup>, Hao Cai<sup>1</sup>, Qiao Gao<sup>3</sup>, Weizhong Jiang<sup>3\*</sup>, Zheng Guo<sup>1\*</sup>

### **Supplementary Information**

**Supplementary Table 1.** The known 113 genes of pCRT-response including 85 effective genes and 28 pharmacokinetic genes, which were collected from the two previous study<sup>1,2</sup>.

**Supplementary Table 2.** The 57 genes shared by cancer-related pCRT-response genes and differentially expressed (DE) genes between the non-responders and responders of LARCs.

## Supplementary Tables

Supplementary Table 1. The known 113 genes involved in pCRT-response including 85 effective genes and 28 pharmacokinetic genes.

| Gene ID | Gene symbol | Functional category | Function                            |
|---------|-------------|---------------------|-------------------------------------|
| 318     | NUDT2       | effective           | Metabolism of pyrimidine and purine |
| 471     | ATIC        | effective           | Metabolism of pyrimidine and purine |
| 953     | ENTPD1      | effective           | Metabolism of pyrimidine and purine |
| 955     | ENTPD6      | effective           | Metabolism of pyrimidine and purine |
| 956     | ENTPD3      | effective           | Metabolism of pyrimidine and purine |
| 957     | ENTPD5      | effective           | Metabolism of pyrimidine and purine |
| 978     | CDA         | effective           | Metabolism of pyrimidine and purine |
| 1806    | DPYD        | effective           | Metabolism of pyrimidine and purine |
| 1807    | DPYS        | effective           | Metabolism of pyrimidine and purine |
| 1841    | DTYMK       | effective           | Metabolism of pyrimidine and purine |
| 1854    | DUT         | Effective           | Metabolism of pyrimidine and purine |
| 1890    | TYMP        | effective           | Metabolism of pyrimidine and purine |
| 2618    | GART        | effective           | Metabolism of pyrimidine and purine |
| 3704    | ITPA        | effective           | Metabolism of pyrimidine and purine |
| 4830    | NME1        | effective           | Metabolism of pyrimidine and purine |
| 4831    | NME2        | effective           | Metabolism of pyrimidine and purine |
| 4832    | NME3        | effective           | Metabolism of pyrimidine and purine |
| 4833    | NME4        | effective           | Metabolism of pyrimidine and purine |
| 4907    | NT5E        | effective           | Metabolism of pyrimidine and purine |
| 6240    | RRM1        | effective           | Metabolism of pyrimidine and purine |
| 6241    | RRM2        | effective           | Metabolism of pyrimidine and purine |
| 7083    | TK1         | effective           | Metabolism of pyrimidine and purine |
| 7084    | TK2         | effective           | Metabolism of pyrimidine and purine |
| 7296    | TXNRD1      | effective           | Metabolism of pyrimidine and purine |
| 7298    | TYMS        | effective           | Metabolism of pyrimidine and purine |

|        |        |           |                                             |
|--------|--------|-----------|---------------------------------------------|
| 7371   | UCK2   | effective | Metabolism of pyrimidine and purine         |
| 7372   | UMPS   | effective | Metabolism of pyrimidine and purine         |
| 7378   | UPP1   | effective | Metabolism of pyrimidine and purine         |
| 8382   | NME5   | effective | Metabolism of pyrimidine and purine         |
| 9583   | ENTPD4 | effective | Metabolism of pyrimidine and purine         |
| 10201  | NME6   | effective | Metabolism of pyrimidine and purine         |
| 10587  | TXNRD2 | effective | Metabolism of pyrimidine and purine         |
| 22978  | NT5C2  | effective | Metabolism of pyrimidine and purine         |
| 29922  | NME7   | effective | Metabolism of pyrimidine and purine         |
| 30833  | NT5C   | effective | Metabolism of pyrimidine and purine         |
| 50484  | RRM2B  | effective | Metabolism of pyrimidine and purine         |
| 50808  | AK3    | effective | Metabolism of pyrimidine and purine         |
| 51251  | NT5C3  | effective | Metabolism of pyrimidine and purine         |
| 51733  | UPB1   | effective | Metabolism of pyrimidine and purine         |
| 56474  | CTPS2  | effective | Metabolism of pyrimidine and purine         |
| 56953  | NT5M   | effective | Metabolism of pyrimidine and purine         |
| 83549  | UCK1   | effective | Metabolism of pyrimidine and purine         |
| 84618  | NT5C1A | effective | Metabolism of pyrimidine and purine         |
| 87178  | PNPT1  | effective | Metabolism of pyrimidine and purine         |
| 93034  | NT5C1B | effective | Metabolism of pyrimidine and purine         |
| 124583 | CANT1  | effective | Metabolism of pyrimidine and purine         |
| 151531 | UPP2   | effective | Metabolism of pyrimidine and purine         |
| 59     | ACTA2  | effective | DNA repair/apoptosis/cell cycle regulation  |
| 142    | PARP1  | effective | DNA repair /apoptosis/cell cycle regulation |
| 332    | BIRC5  | effective | DNA repair/apoptosis/cell cycle regulation  |
| 467    | ATF3   | effective | DNA repair/apoptosis/cell cycle regulation  |
| 472    | ATM    | effective | DNA repair/apoptosis/cell cycle regulation  |
| 545    | ATR    | effective | DNA repair/apoptosis/cell cycle regulation  |
| 581    | BAX    | effective | DNA repair/apoptosis/cell cycle regulation  |

|       |          |           |                                            |
|-------|----------|-----------|--------------------------------------------|
| 596   | BCL2     | effective | DNA repair/apoptosis/cell cycle regulation |
| 891   | CCNB1    | effective | DNA repair/apoptosis/cell cycle regulation |
| 900   | CCNG1    | effective | DNA repair/apoptosis/cell cycle regulation |
| 970   | CD70     | effective | DNA repair/apoptosis/cell cycle regulation |
| 1111  | CHEK1    | effective | DNA repair/apoptosis/cell cycle regulation |
| 1263  | PLK3     | effective | DNA repair/apoptosis/cell cycle regulation |
| 1643  | DDB2     | effective | DNA repair/apoptosis/cell cycle regulation |
| 1647  | GADD45A  | effective | DNA repair/apoptosis/cell cycle regulation |
| 2232  | FDXR     | effective | DNA repair/apoptosis/cell cycle regulation |
| 2956  | MSH6     | effective | DNA repair/apoptosis/cell cycle regulation |
| 3146  | HMGB1    | effective | DNA repair/apoptosis/cell cycle regulation |
| 3364  | HUS1     | effective | DNA repair/apoptosis/cell cycle regulation |
| 4292  | MLH1     | effective | DNA repair/apoptosis/cell cycle regulation |
| 4318  | MMP9     | effective | DNA repair/apoptosis/cell cycle regulation |
| 4436  | MSH2     | effective | DNA repair/apoptosis/cell cycle regulation |
| 4609  | MYC      | effective | DNA repair/apoptosis/cell cycle regulation |
| 5111  | PCNA     | effective | DNA repair/apoptosis/cell cycle regulation |
| 5395  | PMS2     | effective | DNA repair/apoptosis/cell cycle regulation |
| 7157  | TP53     | effective | DNA repair/apoptosis/cell cycle regulation |
| 7374  | UNG      | effective | DNA repair/apoptosis/cell cycle regulation |
| 7515  | XRCC1    | effective | DNA repair/apoptosis/cell cycle regulation |
| 8493  | PPM1D    | effective | DNA repair/apoptosis/cell cycle regulation |
| 8795  | TNFRSF10 | effective | DNA repair/apoptosis/cell cycle regulation |
|       | 8        |           |                                            |
| 9156  | EXO1     | effective | DNA repair/apoptosis/cell cycle regulation |
| 9538  | EI24     | effective | DNA repair/apoptosis/cell cycle regulation |
| 9656  | MDC1     | effective | DNA repair/apoptosis/cell cycle regulation |
| 10038 | PARP2    | effective | DNA repair/apoptosis/cell cycle regulation |
| 10769 | PLK2     | effective | DNA repair/apoptosis/cell cycle regulation |

|        |         |                 |                                            |
|--------|---------|-----------------|--------------------------------------------|
| 11200  | CHEK2   | effective       | DNA repair/apoptosis/cell cycle regulation |
| 23583  | SMUG1   | effective       | DNA repair/apoptosis/cell cycle regulation |
| 27113  | BBC3    | effective       | DNA repair/apoptosis/cell cycle regulation |
| 275    | AMT     | pharmacokinetic | Metabolism of drug                         |
| 1066   | CES1    | pharmacokinetic | Metabolism of drug                         |
| 1719   | DHFR    | pharmacokinetic | Metabolism of drug                         |
| 2030   | SLC29A1 | pharmacokinetic | Transporters                               |
| 2597   | GAPDH   | pharmacokinetic | Housekeeping                               |
| 3177   | SLC29A2 | pharmacokinetic | Transporters                               |
| 4522   | MTHFD1  | pharmacokinetic | Metabolism of drug                         |
| 4524   | MTHFR   | pharmacokinetic | Metabolism of drug                         |
| 4548   | MTR     | pharmacokinetic | Metabolism of drug                         |
| 6470   | SHMT1   | pharmacokinetic | Metabolism of drug                         |
| 6472   | SHMT2   | pharmacokinetic | Metabolism of drug                         |
| 8824   | CES2    | pharmacokinetic | Metabolism of drug                         |
| 9153   | SLC28A2 | pharmacokinetic | Transporters                               |
| 9154   | SLC28A1 | pharmacokinetic | Transporters                               |
| 10057  | ABCC5   | pharmacokinetic | Transporters                               |
| 10257  | ABCC4   | pharmacokinetic | Transporters                               |
| 10588  | MTHFS   | pharmacokinetic | Metabolism of drug                         |
| 10797  | MTHFD2  | pharmacokinetic | Metabolism of drug                         |
| 10840  | ALDH1L1 | pharmacokinetic | Metabolism of drug                         |
| 10841  | FTCD    | pharmacokinetic | Metabolism of drug                         |
| 25902  | MTHFD1L | pharmacokinetic | Metabolism of drug                         |
| 55315  | SLC29A3 | pharmacokinetic | Transporters                               |
| 64078  | SLC28A3 | pharmacokinetic | Transporters                               |
| 85320  | ABCC11  | pharmacokinetic | Transporters                               |
| 94160  | ABCC12  | pharmacokinetic | Transporters                               |
| 123263 | MTFMT   | pharmacokinetic | Metabolism of drug                         |

|        |         |                 |                    |
|--------|---------|-----------------|--------------------|
| 222962 | SLC29A4 | pharmacokinetic | Transporters       |
| 401840 | NP      | pharmacokinetic | Metabolism of drug |

---

Supplementary Table 2. The 57 genes shared by cancer-related pCRT-response genes and DE genes between the non-responders and responders of LARCs

| Gene ID | Gene symbol        | Results from DE genes           | Results from the cancer-related pCRT-response genes |                        |
|---------|--------------------|---------------------------------|-----------------------------------------------------|------------------------|
|         |                    | Subgroup with higher expression | Subgroup with higher deregulated frequency          | Dysregulated direction |
| 891     | CCNB1 <sup>1</sup> | Responder                       | Responder                                           | up-regulated           |
| 1160    | CKMT2              | Responder                       | Responder                                           | up-regulated           |
| 1373    | CPS1               | Non-responder                   | Non-responder                                       | up-regulated           |
| 1734    | DIO2               | Responder                       | Responder                                           | up-regulated           |
| 1894    | ECT2               | Responder                       | Responder                                           | up-regulated           |
| 2920    | CXCL2              | Responder                       | Responder                                           | up-regulated           |
| 3207    | HOXA11             | Responder                       | Responder                                           | up-regulated           |
| 3627    | CXCL10             | Responder                       | Responder                                           | up-regulated           |
| 4285    | MIPEP              | Responder                       | Responder                                           | up-regulated           |
| 4841    | NONO <sup>2</sup>  | Responder                       | Non-responder                                       | down-regulated         |
| 5122    | PCSK1              | Non-responder                   | Non-responder                                       | up-regulated           |
| 5152    | PDE9A              | Non-responder                   | Responder                                           | down-regulated         |
| 5339    | PLEC               | Non-responder                   | Non-responder                                       | up-regulated           |
| 5440    | POLR2K             | Responder                       | Responder                                           | up-regulated           |
| 5501    | PPP1CC             | Responder                       | Non-responder                                       | down-regulated         |
| 5693    | PSMB5              | Responder                       | Non-responder                                       | down-regulated         |
| 5983    | RFC3               | Responder                       | Responder                                           | up-regulated           |

|       |              |               |               |                |
|-------|--------------|---------------|---------------|----------------|
| 6152  | RPL24        | Responder     | Non-responder | down-regulated |
| 6662  | SOX9         | Responder     | Responder     | up-regulated   |
| 6920  | TCEA3        | Non-responder | Responder     | down-regulated |
| 6947  | TCN1         | Non-responder | Non-responder | up-regulated   |
| 7538  | ZFP36        | Responder     | Non-responder | down-regulated |
| 8838  | WISP3        | Non-responder | Non-responder | up-regulated   |
| 9254  | CACNA2D<br>2 | Non-responder | Non-responder | up-regulated   |
| 10383 | TUBB4B       | Responder     | Non-responder | down-regulated |
| 10418 | SPON1        | Non-responder | Responder     | down-regulated |
| 10449 | ACAA2        | Responder     | Non-responder | down-regulated |
| 10519 | CIB1         | Non-responder | Responder     | down-regulated |
| 10628 | TXNIP        | Non-responder | Responder     | down-regulated |
| 11075 | STMN2        | Non-responder | Responder     | down-regulated |
| 11346 | SYNPO        | Non-responder | Non-responder | up-regulated   |
| 23584 | VSIG2        | Non-responder | Responder     | down-regulated |
| 27166 | PRELID1      | Responder     | Non-responder | down-regulated |
| 27243 | CHMP2A       | Non-responder | Responder     | down-regulated |
| 29887 | SNX10        | Responder     | Responder     | up-regulated   |
| 30812 | SOX8         | Non-responder | Responder     | down-regulated |
| 51090 | PLLP         | Non-responder | Responder     | down-regulated |
| 51655 | RASD1        | Non-responder | Responder     | down-regulated |



|        |         |               |               |                |
|--------|---------|---------------|---------------|----------------|
| 54716  | SLC6A20 | Responder     | Responder     | up-regulated   |
| 54892  | NCAPG2  | Responder     | Responder     | up-regulated   |
| 55107  | ANO1    | Non-responder | Non-responder | up-regulated   |
| 55603  | FAM46A  | Non-responder | Responder     | down-regulated |
| 57002  | C7orf36 | Responder     | Responder     | up-regulated   |
| 57556  | SEMA6A  | Non-responder | Responder     | down-regulated |
| 79576  | NKAP    | Responder     | Responder     | up-regulated   |
| 79633  | FAT4    | Responder     | Responder     | up-regulated   |
| 83540  | NUF2    | Responder     | Responder     | up-regulated   |
| 83998  | REG4    | Non-responder | Non-responder | up-regulated   |
| 84133  | ZNRF3   | Responder     | Responder     | up-regulated   |
| 84141  | FAM176A | Responder     | Responder     | up-regulated   |
| 90293  | KLHL13  | Non-responder | Non-responder | up-regulated   |
| 93010  | B3GNT7  | Non-responder | Responder     | down-regulated |
| 116154 | PHACTR3 | Responder     | Responder     | up-regulated   |
| 220134 | SKA1    | Responder     | Responder     | up-regulated   |
| 221656 | KDM1B   | Responder     | Responder     | up-regulated   |
| 256714 | MAP7D2  | Responder     | Responder     | up-regulated   |
| 729993 | SHISA9  | Non-responder | Non-responder | up-regulated   |

---

Note: <sup>1</sup> DE genes revealed that CCNB1 was up-regulated in the responders vs nonresponders. In contrast, the cancer-related pCRT-response genes revealed that CCNB1 was up-regulated in LARCs vs normal samples, and the deregulated frequency of the responders was more than that of

the nonresponders.<sup>2</sup> DE genes revealed that NONO was up-regulated in the responders vs nonresponders. In contrast, the cancer-related pCRT-response genes revealed that NONO was down-regulated in LARCs vs normal samples, and the deregulated frequency of the responders was lower than that of the nonresponders. The difference of deregulated pattern between CCNB1 and NONO cannot be detected by DE genes.

## References

1. Tan, W. L. *et al.* Low cytosine triphosphate synthase 2 expression renders resistance to 5-fluorouracil in colorectal cancer. *Cancer biology & therapy* **11**, 599-608 (2011).
2. Oh, J. H. & Deasy, J. O. Inference of radio-responsive gene regulatory networks using the graphical lasso algorithm. *BMC bioinformatics* **15 Suppl 7**, S5, doi:10.1186/1471-2105-15-S7-S5 (2014).
